# Supplementary material for: Common lipid-altering gene variants are associated with therapeutic intervention thresholds of lipid levels in older people
Source: PubMed Central journal article supplement — Eur Heart J. 2009 May 12;30(14):1711–9. doi: 10.1093/eurheartj/ehp161 (PMC2709886; doi:10.1093/eurheartj/ehp161), 2009-05-12

## Supplementary Information

Figure 1: Frequency of men and women by HDL allele count, with box-plots of the distribution of HDL serum levels. Dotted lines indicates recommended levels, with less than 40mg/dl being a risk factor for CAD and greater than 60mg/dl being protective.

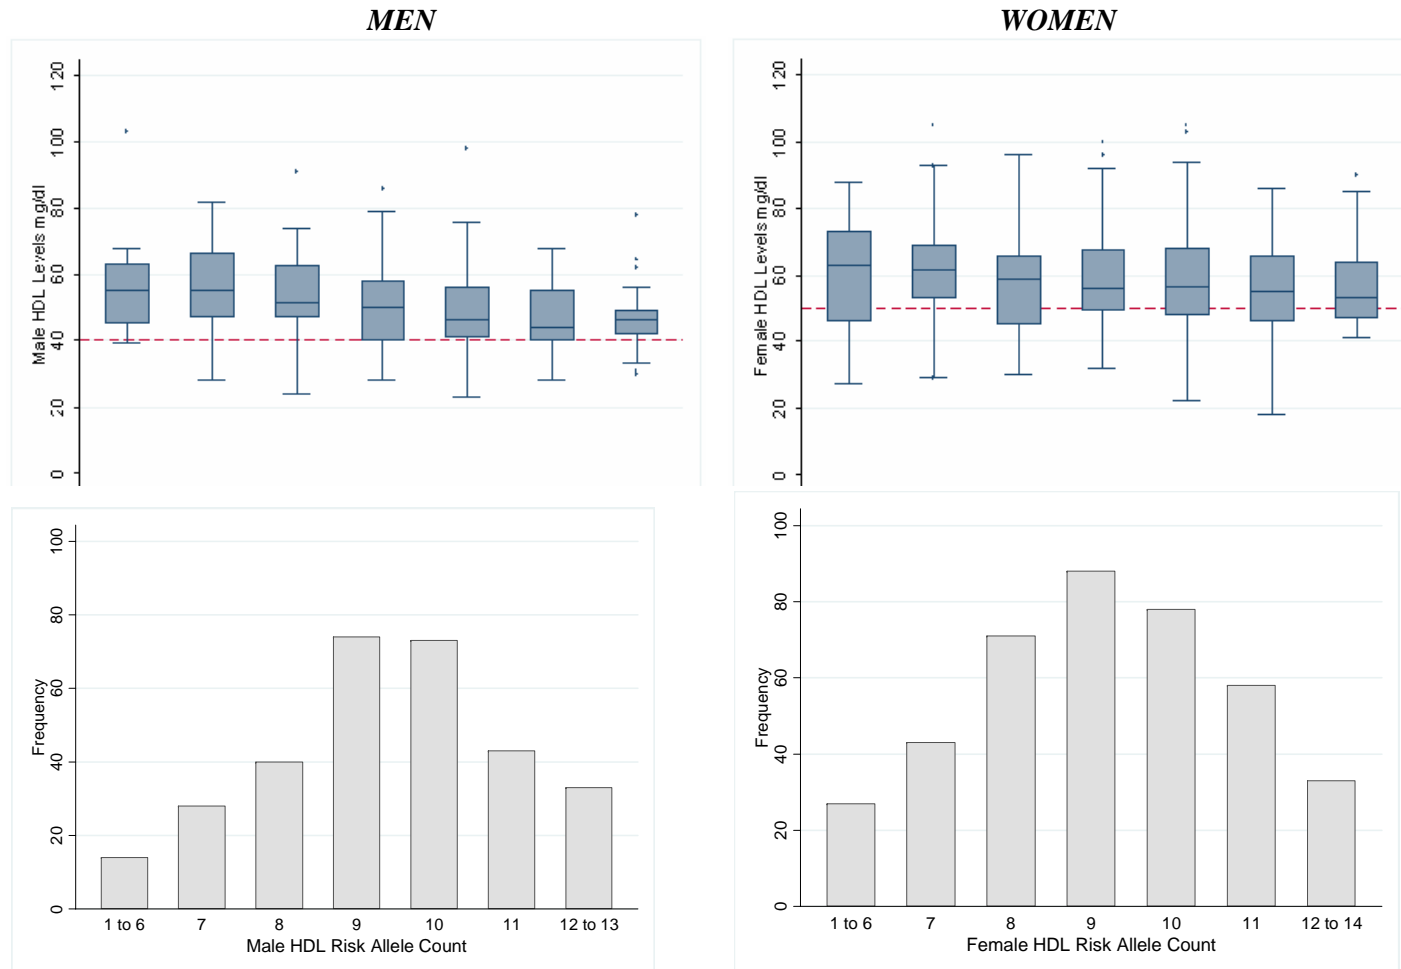

Supplement: ehp161_1.pdf [file ehp161_1.pdf]
